# Supplementary material for: Influence of Co-Precipitation Agent on the Structure, Texture and Catalytic Activity of Au-CeO2 Catalysts in Low-Temperature Oxidation of Benzyl Alcohol
Source: MDPI journal article supplement (doi:10.3390/catal11050641), 2021-05-18
Supplement: s1 [file s1]

Archive with 1 entries (1 files):
- catalysts-1230247-supplementary.pdf
